# Supplementary material
Source: PubMed Central journal article supplement (PMC3488091)
Supplement: supp_M112.408286_jbc.M112.408286-1.pdf [file supp_M112.408286_jbc.M112.408286-1.pdf]

## **SUPPLEMENTAL INFORMATION**

**A Single Point Mutation in the Gene Encoding Gb3/CD77 Synthase Causes a Rare Inherited Polyagglutination Syndrome**

**Anna Suchanowska, Radosław Kaczmarek, Maria Duk, Jolanta Lukaszewicz, Dorota Smolarek, Edyta Majorczyk, Ewa Jaskiewicz, Anna Laskowska, Kazimiera Wasniowska, Magdalena Grodecka, Elwira Lisowska, Marcin Czerwinski**

To whom correspondence should be addressed: Marcin Czerwinski, Department of Immunochemistry, LudwikHirsfeld Institute of Immunology and Experimental Therapy, Polish Academy of Sciences, 53-114 Wrocław, Poland. Tel.: (48-71) 337-1172; Fax: (48-71) 337 2171; E- mail: [czerwins@iitd.pan.wroc.pl](mailto:czerwins@iitd.pan.wroc.pl)

**Table S1: Primer sequences used in the study.**

| Primer          | Sequence (5'>3')                 | Application                                                                                            |
|-----------------|----------------------------------|--------------------------------------------------------------------------------------------------------|
| Pk For          | GGTTCCTGCTGGAAGCTCCTGGTCT        | amplification of <i>A4GALT</i> ORF                                                                     |
| PkRev           | GCTCCTCAACAGCCTGCCTAA            |                                                                                                        |
| PkSeqFor        | TCGCACTCATGTGGAAG                | sequencing of <i>A4GALT</i> ORF                                                                        |
| PkSeqRev        | AGTACATTTTCATGGCCT               |                                                                                                        |
| Tmvic probe     | CGGGACTGGGTGCC                   | probes for TaqMan assay                                                                                |
| Tmfam probe     | CGGGACTCGGTGCC                   |                                                                                                        |
| TM For          | GCGGAACCTGACCAACGT               | amplification for TaqMan assay                                                                         |
| TM Rev          | GCGCCGTTGAGGACGTA                |                                                                                                        |
| PkXho For       | CCCCTCGAGGCCACCATGTCCAAGCCCCCGAC | introduction of <u>Xho</u> I restriction site                                                          |
| PkNot Rev       | GCGGCCGCTCACAAGTACATTTTCATGGCCTC | introduction of <u>Not</u> I restriction site                                                          |
| PkWTmut1 For    | TGCTGGGCACCCAGTCCCGCTAC          | mutagenic primers that introduce the C631G mutation into cDNA encoding the consensus Gb3/CD77 synthase |
| PkWTmut2 For    | GTAGCGGGACTGGGTGCCAGCA           |                                                                                                        |
| PkQ211Emut1 For | TGCTGGGCACCGAGTCCCGCTAC          | mutagenic primers that introduce the G631C mutation into cDNA encoding the Gb3/CD77 Q211E synthase     |
| PkQ211Emut2 For | GTAGCGGGACTCGGTGCCAGCA           |                                                                                                        |
| PCAG For        | CGTGCTGGTTGTTGTGCTGTCTCA         | primers complementary to the Pcac mutagenesis vector                                                   |
| PCAG Rev        | ACAAACGCACACCGGCCTTATCC          |                                                                                                        |

**Table S2: PCR programs used in the study.**

|                      | Amplification of <i>A4GALT</i> ORF from genomic DNA |          |       | Preparation of expression vector |          |       | Mutagenesis I step |          |       | Mutagenesis II step |          |       |
|----------------------|-----------------------------------------------------|----------|-------|----------------------------------|----------|-------|--------------------|----------|-------|---------------------|----------|-------|
|                      | Temp [°C]                                           | Time [s] | Cycle | Temp [°C]                        | Time [s] | Cycle | Temp [°C]          | Time [s] | Cycle | Temp [°C]           | Time [s] | Cycle |
| Initial denaturation | 94                                                  | 180      | 1     | 94                               | 180      | 1     | 94                 | 180      | 1     | 94                  | 180      | 1     |
| Denaturation         | 94                                                  | 30       | 30    | 94                               | 30       | 30    | 94                 | 30       | 30    | 94                  | 30       | 30    |
| Annealing            | 64                                                  | 30       |       | 64                               | 30       |       | 69                 | 30       |       | 69                  | 30       |       |
| Extension            | 72                                                  | 150      |       | 72                               | 150      |       | 72                 | 75       |       | 72                  | 75       |       |
| Final Extension      | 72                                                  | 600      | 1     | 72                               | 600      | 1     | 72                 | 600      | 1     | 72                  | 600      | 1     |

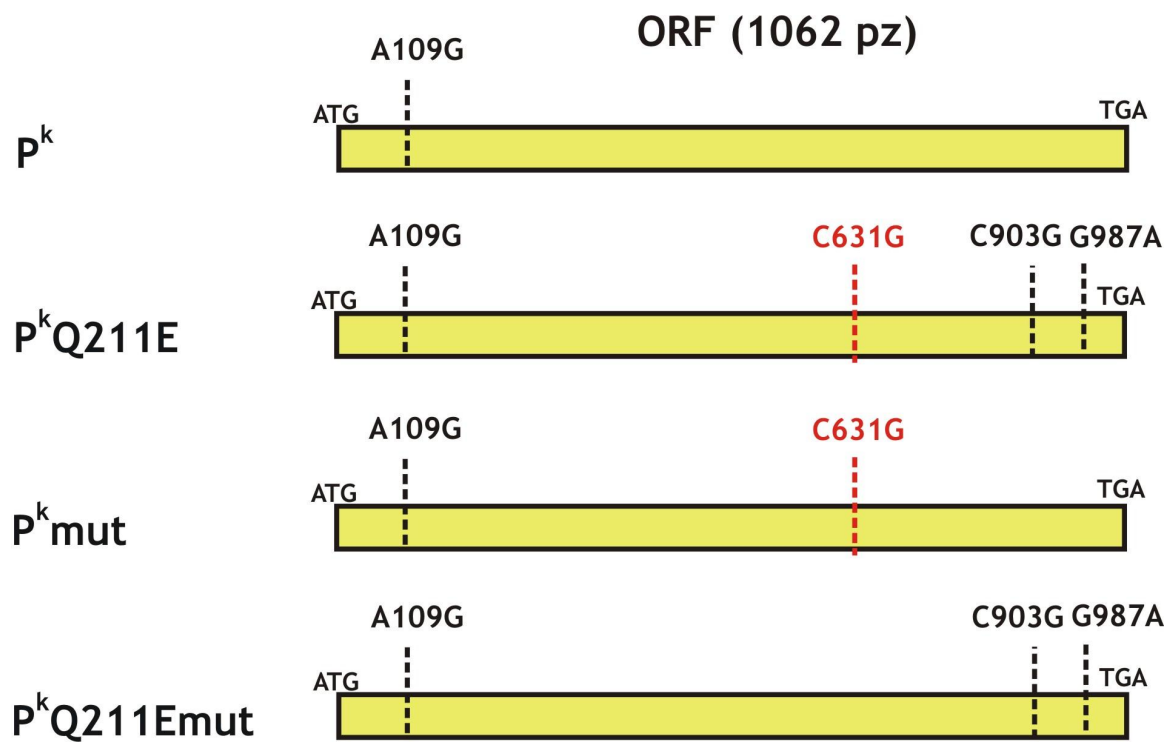

**FIGURE S1: Schematic representation of the consensus and Q211E versions of *A4GALT* open reading frames used throughout the study.**

Allelic Discrimination

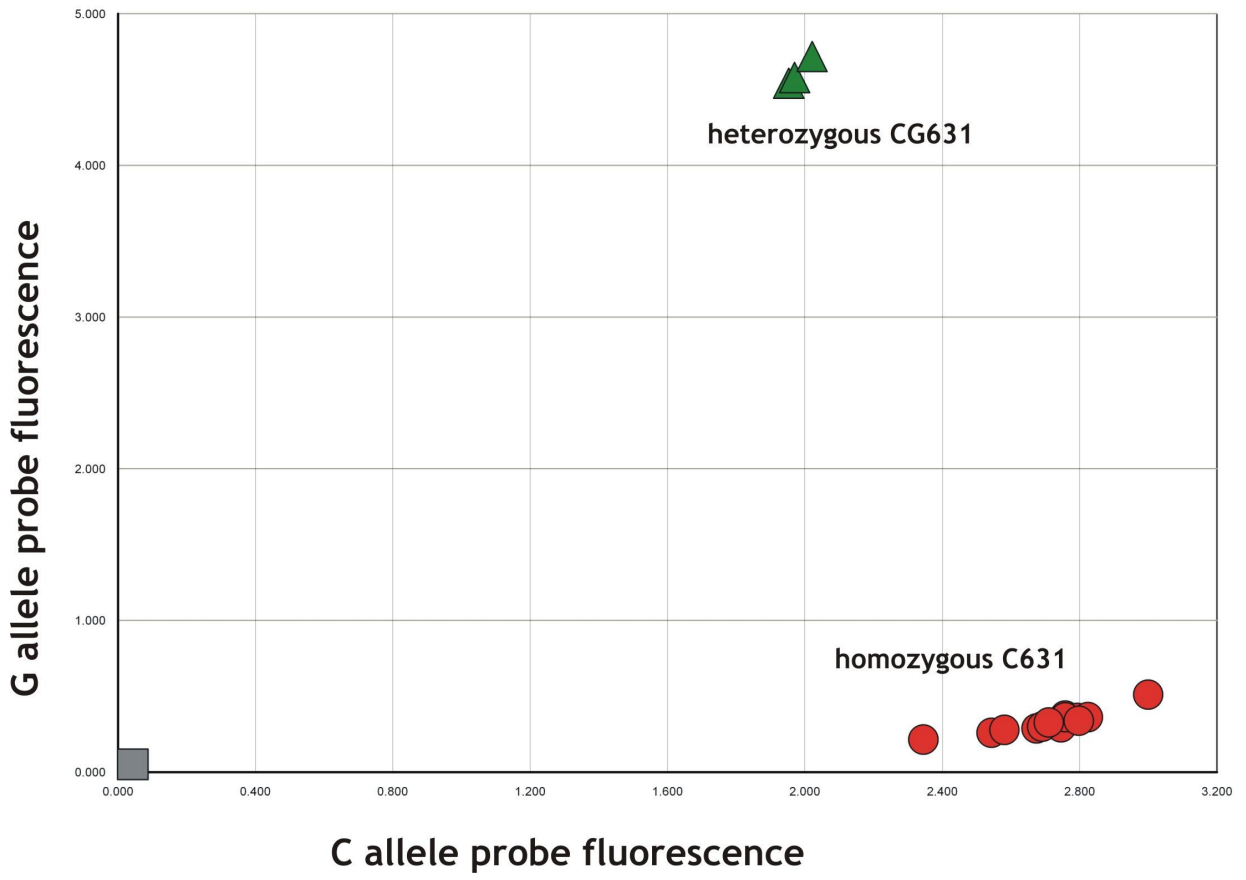

**FIGURE S2: Allelic discrimination by a TaqMan SNP genotyping assay for C631G.**
